# Supplementary material
Source: PubMed Central journal article supplement (PMC4504840)
Supplement: NIHMS643545-supplement-01.pdf [file NIHMS643545-supplement-01.pdf]

---

**Legends for Supplementary Figures:****Figure S1 : Chemical structure of berberine-Cl.****Figure S2: AOM/DSS induced colitis carcinogenesis animal study procedure.**

Six week old FVB mice were given 10 mg/kg Azoxymethane (AOM) by intraperitoneal injection. One week later mice are exposed to 2% Dextran Sodium Sulphate (DSS) in the drinking water for 7 days. One day after DSS treatment, mice were treated with 40 mg/kg Berberine or PBS by oral gavage. On day 28, 5 mice from each group were euthanized and colons and liver tissues were collected. After 10 weeks, remaining mice of each group (n=10) were euthanized and colon tissue was collected. Berberine or vehicle (PBS) was administrated once a day for two continuous weeks, then three times a week until to the end of the study.

**Figure S3: Berberine inhibits colon cancer cell growth and induces apoptosis *in vitro*.**

$2 \times 10^4$  cells (A) HCT1116, (B) SW480, (C) LOVO were seeded into 96 well plates and after 24 hours were treated with 0 to 100  $\mu\text{mol/L}$  berberine. At 24, 48 and 72 hours after berberine treatment, the cell viability was determined using the 3-(4,5-dimethylthiazol-2-yl)-2,5-diphenyltetrazolium bromide assay as described in Materials and Methods.

Absorbance at 570nm was detected with Micro plate reader. The experiments were independently performed at three time repeated.  $*P < 0.05$ ,  $**P < 0.01$  and  $***P < 0.001$  indicates a significantly different compared with DMSO control by *t-test*. (D) HCT116 cells or (E) SW480 cells were grown in 100mm dishes ( $2 \times 10^6$  cells per dish) and

---

treated with indicated concentration of berberine (0-60  $\mu\text{mol/L}$ ) for 24 hours. Cells were stained with Annexin V -FITC and Propidium Iodide, followed by flow cytometric analysis. Results were shown as mean  $\pm$  SE (n=3). The experiments were independently performed at three time repeated.  $**P < 0.01$ , indicates a significantly different compared with DMSO control.

**Figure S4: Activation of AMPK is independent of LKB1 activation; berberine does not inhibit AKT and ERK activities; berberine does activate AMPK in mouse liver.**

Three CRC cell lines were treated with 0 to 60  $\mu\text{mol/L}$  berberine for 24 hours. The extracted protein was analyzed by Western blot. **(A)** Berberine does not induce phosphorylation of LKB1. Total (LKB1) and phospho-LKB1 (p-LKB1) levels are shown. Blots are representative of three independent experiments. **(B)** Both AKT and ERK1/2 are phosphorylated in berberine treated CRC cells. Total and phosphorylated AKT (AKT and p-AKT respectively) and ERK1/2 (ERK and p-ERK respectively) are shown. Blots are representative of three independent experiments. **(C)** Berberine activated AMPK in the liver on day 28. Liver tissue was collected from 5 mice per group, lysed and protein extracts were analyzed by Western blot for total and phosphorylated AMPK. A represented of 2 blots from each group is shown. Densitometry analysis of p-AMPK levels relative to total AMPK for each mouse (n=5) is shown.
